# Supplementary material for: Continuous Monitoring of a Soil Aquifer Treatment System’s Physico-Chemical Conditions to Optimize Operational Performance
Source: Copernicus journal article supplement (doi:10.5194/hess-2021-455), 2021-10-07
Supplement: Supplementary file 1 [file hess-2021-455-supplement.pdf]

1 Supporting Information for:

2 **Continuous Monitoring of a Soil Aquifer Treatment System's Physico-Chemical**  
3 **Conditions to Optimize Operational Performance**

4  
5 Tuvia Turkeltaub<sup>a</sup>, Ron Mannheim<sup>b</sup>, Alex Furman<sup>b</sup>, Noam Weisbrod<sup>a</sup>

6 <sup>a</sup>Department of Environmental Hydrology and Microbiology, Zuckerberg Institute for Water  
7 Research, The Jacob Blaustein Institutes for Desert Research, Ben-Gurion University of the  
8 Negev, Sede Boqer Campus, Midreshet Ben-Gurion, 84990 Israel.

9 <sup>b</sup>Technion – Israel Institute of Technology, Civil and Environmental Engineering, Haifa 32000,  
10 Israel

11  
12 **Contents of this file**

13 4 pages

14 5 Figures

15  
16 **Introduction**

17 This supporting information provides the quality characteristics of the effluent from the Shafdan  
18 wastewater treatment plant, which is subsequently spread over the Shafdan infiltration basins,  
19 including the Yavne 1 site (Figure S1). The measured saturated hydraulic conductivity (Ks)  
20 profile is presented in Figure S2. Figure S3 and Figure S4 present the calibration and validation  
21 results of the hydrological model. Figure S5 presents the calibration results for the water content  
22 data that were collected during winter under long wetting and drying cycles.

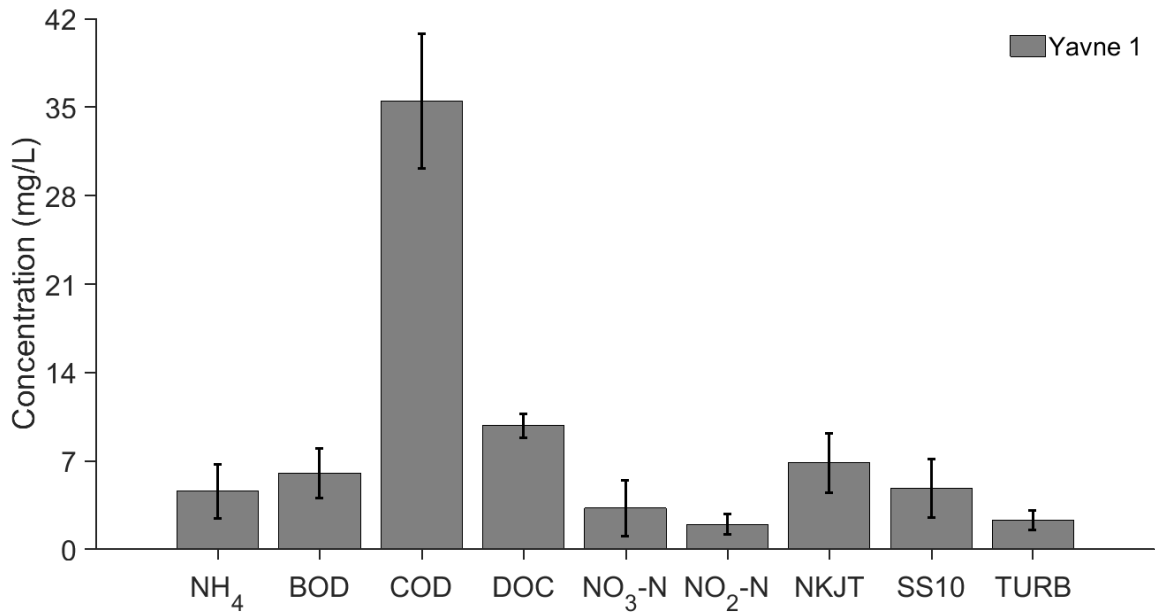

23

24 **Figure S1.** *The chemistry of the effluents of the Shafdan wastewater treatment plant*  
 25 *(WWTP) that feed the infiltration ponds. The chemical analysis was performed by*  
 26 *Shafdan's operator, Mekorot Co. Ltd.*

27

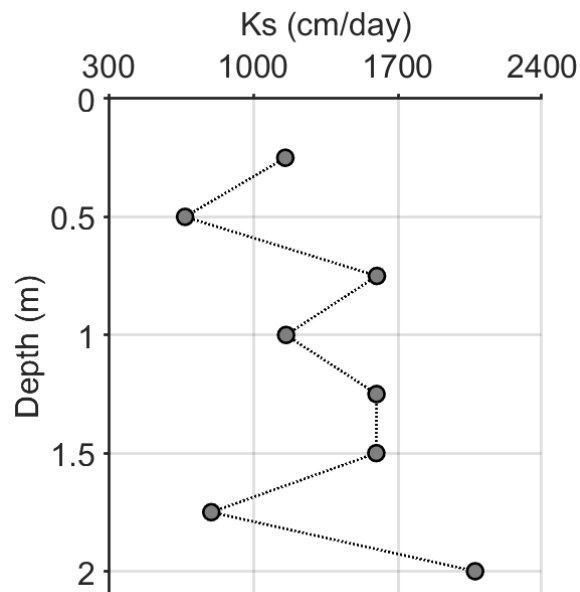

28

29 **Figure S2.** *Measured saturated hydraulic conductivities (Ks) with depth in the vadose*  
 30 *zone's soil profile under the Yavne 1 site. The Ks values were calculated by*

31  
32  
33  
34

*conducting flow experiments with undisturbed soil cores excavated at multiple depths of the vadose zone.*

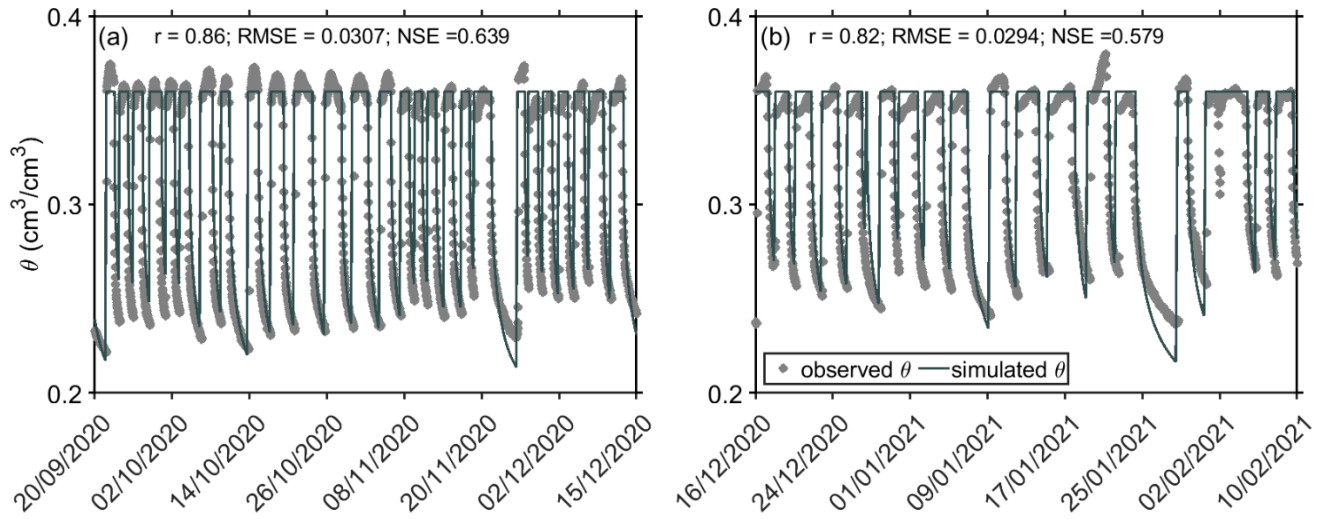

35

36 **Figure S3.** *Observed and simulated water content time series at 25 cm of the SAT vadose zone at*  
37 *station 1: (a) calibration and (b) validation, i.e., at this stage, the calibrated parameters of the*  
38 *hydrological model were not modified. Note that the water content observations were obtained*  
39 *during the short wetting and drying cycles.*

40

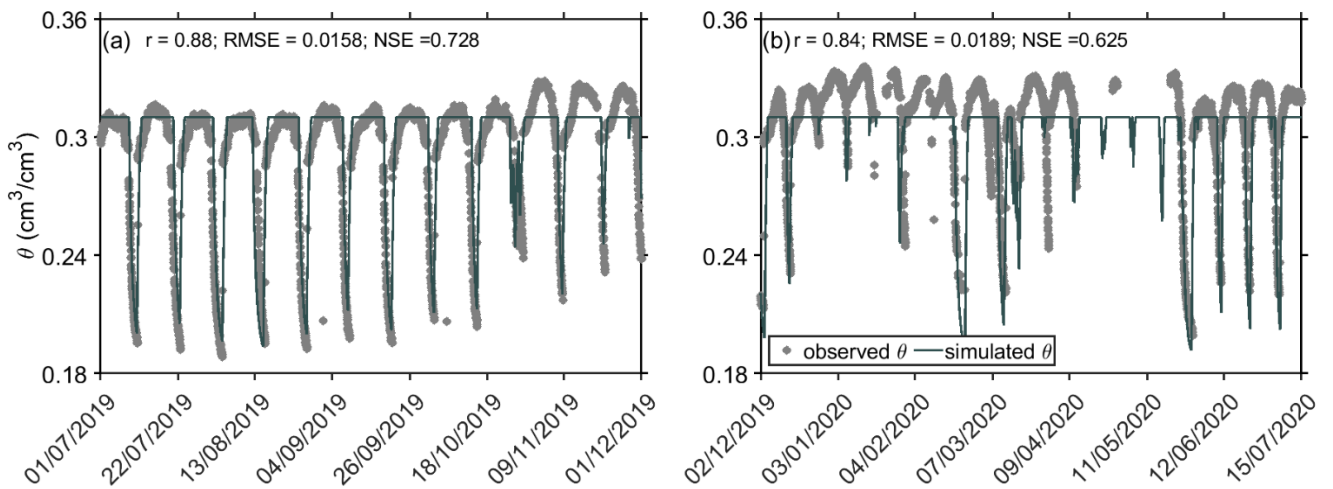

41

42 **Figure S4.** *Observed and simulated water content time series at 25 cm of the SAT vadose zone at*  
43 *station 2: (a) calibration and (b) validation, i.e., at this stage, the calibrated parameters of the*  
44 *hydrological model were not modified. Note that the water content observations were obtained*  
45 *during the long wetting and drying cycles.*

46  
47  
48

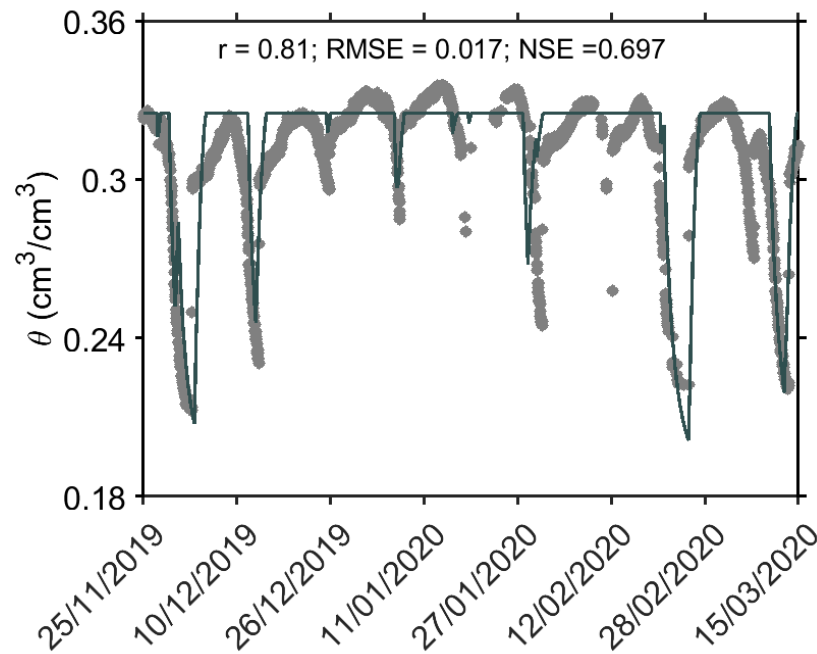

49  
50 **Figure S5.** *Measured and simulated water content time series at 25 cm of the SAT vadose zone at*  
51 *station 2. Note that the water content observations were obtained during winter under long*  
52 *wetting and drying cycles.*

53
